# Supplementary material
Source: PubMed Central journal article supplement (PMC5669069)
Supplement: NIHMS886922-supplement-Supplementary_Video_Legend.pdf [file NIHMS886922-supplement-Supplementary_Video_Legend.pdf]

**Supplementary Video 1 | Class 1 to class 2 transition.** Animated video shows morph between atomic models generated from “class 1” and “class 2” maps (Ext. Data Fig. 7). Atomic models were generated by real space refinement of the consensus model into the maps for the corresponding classes in PHENIX.

**Supplementary Video 2 | Class 1 to class 3 transition.** Animated video shows morph between atomic models generated from “class 1” and “class 3” maps (Ext. Data Fig. 7). Atomic models were generated as in Extended Data Video 1.

**Supplementary Video 3 | Class 2 to class 3 transition.** Animated video shows morph between atomic models generated from “class 2” and “class 3” maps (Ext. Data Fig. 7). Atomic models were generated as in Extended Data Video 1.

**Supplementary Figure 1 |** The un-cropped SDS PAGE gel from which the Extended Data Figure 2a was extracted.
